# Supplementary material for: Role of neutrophil chemoattractant CXCL5 in SARS-CoV-2 infection-induced lung inflammatory innate immune response in an in vivo hACE2 transfection mouse model
Source: PubMed Central journal article supplement — Zool Res. 2020 Nov 18;41(6):621–31. doi: 10.24272/j.issn.2095-8137.2020.118 (PMC7671918; doi:10.24272/j.issn.2095-8137.2020.118), 2020-11-18
Supplement: zr-41-6-621-S1.pdf [file zr-41-6-621-S1.pdf]

## Supplementary Material

**Supplementary Table S1 qRT-PCR primers for cytokine mRNAs**

| Genes          | Direction | Sequence                |
|----------------|-----------|-------------------------|
| $\beta$ -actin | forward   | gtgacgttgacatccgtaaaga  |
|                | reverse   | gccggactcatcgactcc      |
| IL-1 $\beta$   | forward   | gaaatgccacctttgacagtg   |
|                | reverse   | tggatgctctcatcaggacag   |
| TNF- $\alpha$  | forward   | caggcggcctatgtctc       |
|                | reverse   | cgatcaccggaagttcagtag   |
| IL-6           | forward   | ctgcaagagacttccatccag   |
|                | reverse   | agtggtagacaggctctgttg   |
| IL-2           | forward   | tctcggcatgttctggattt    |
|                | reverse   | atgtgtgtcagagcccttag    |
| IL-4           | forward   | cccagctagttgtcatcctg    |
|                | reverse   | caagtgttttgcgcacccg     |
| IL-10          | forward   | cttactgactggcatgaggatca |
|                | reverse   | gcagctctaggagcatgtgg    |
| IL-12P40       | forward   | gtcctcagaagctaaccatctcc |
|                | reverse   | ccagagcctatgactccatgtc  |
| IL-17          | forward   | tcagcgtgtccaaacactgag   |
|                | reverse   | cgccaaggaggttaaagactt   |
| GM-CSF         | forward   | ggccttggaagcatgtagagg   |
|                | reverse   | ggagaactcgttagagacgactt |
| MIP-1 $\alpha$ | forward   | tgtaccatgacactctgcaac   |
|                | reverse   | caacgatgaattggcgtggaa   |
| CCL5           | forward   | gttccatctcgccattcatgc   |

|               |         |                        |
|---------------|---------|------------------------|
|               | reverse | gcggctatgactgaggaagg   |
| CXCL1         | forward | actgcacccaaaccgaagtc   |
|               | reverse | tggggacaccttttagcatctt |
| CXCL2         | forward | ccaaccaccaggctacagg    |
|               | reverse | gcgtcacactcaagctctg    |
| CXCL5         | forward | gttccatctcgccattcatgc  |
|               | reverse | gcggctatgactgaggaagg   |
| IFN- $\alpha$ | forward | atggctaggctcagcactttc  |
|               | reverse | ctcactcagacttgccagca   |
| IFN- $\beta$  | forward | agctccaagaaaggacgaaca  |
|               | reverse | gccctgtaggtaggttgat    |
| IFN- $\gamma$ | forward | gccacggcacagtcattga    |
|               | reverse | tgctgatggcctgattgtctt  |

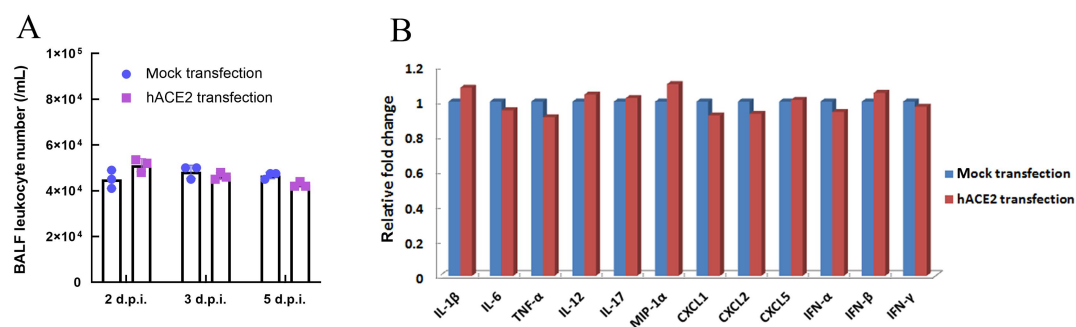

### Supplementary Figure S1 Lung immune response upon hACE2 *in-vivo* transfection

Mice underwent pulmonary transfection with hACE2 expression plasmid (35  $\mu$ g each) or control pCMV3 plasmid (mock transfection) via orotracheal intubation, after which lungs and BALF were harvested from mice at different days post-transfection. A: Total numbers of leukocytes in BALF at different dpi were determined. B: mRNA levels of cytokines from lung tissue homogenates of transfected mice at 2 dpi were examined by qRT-PCR (normalized to  $\beta$ -actin).

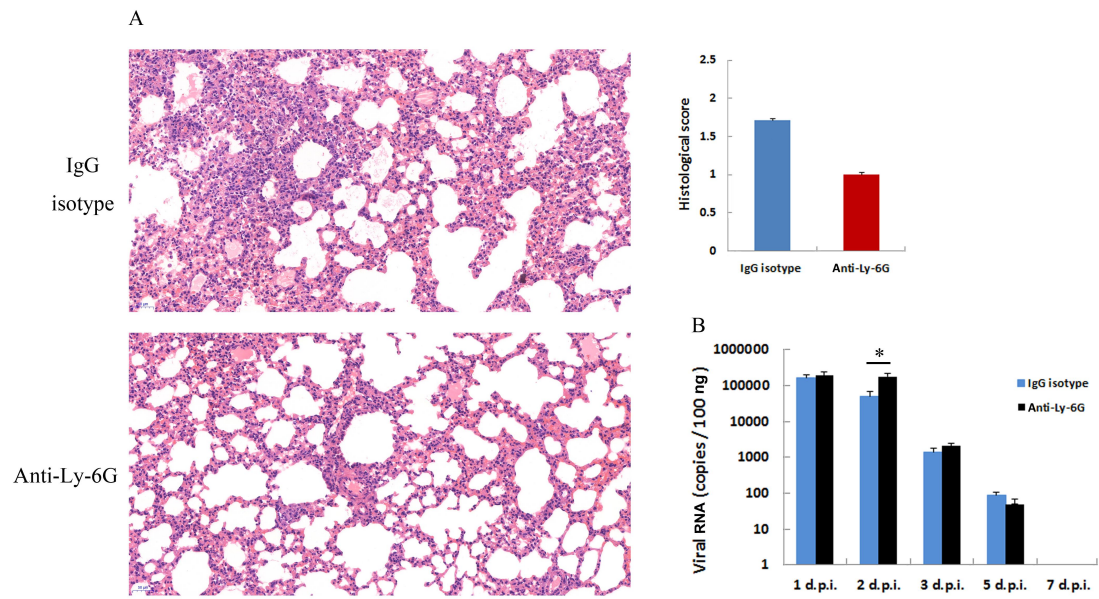

### Supplementary Figure S2 Effects of neutrophil depletion on pulmonary SARS-CoV-2 infection in hACE2 *in-vivo* transfected mice

Two days (48 h) after *in-vivo* transfection with hACE2 plasmid, mice were intranasally infected with SARS-CoV-2 virus ( $1 \times 10^5$  CCID<sub>50</sub>) and received intraperitoneal administration (500  $\mu$ g per mouse) of anti-Ly6G Ab or isotype control antibodies one day before infection and every 48 h thereafter. A: Lungs were harvested from infected mice at 2 dpi, fixed in formalin, and embedded in paraffin. Lung sections were stained with hematoxylin and eosin for histopathological analysis (original magnification, 20 $\times$ ). Lung histological scores were assessed by a veterinary pathologist blind to the study, as described in the Methods and Materials section. B: Lungs were harvested at different dpi, viral RNA was determined based on number of nucleocapsid (N) gene RNA copies detected by qRT-PCR. Error bars indicate standard deviation of triplicate biological samples. \*:  $P < 0.05$  based on Student's *t*-test.
